# Supplementary material for: Heterotrilantanide cluster complexes exhibiting up-conversion luminescence in water
Source: Royal Society of Chemistry journal article supplement (doi:10.1039/d4cc06573e), 2025-01-01
Supplement: d4cc06573e1.pdf [file d4cc06573e1.pdf]

## **Electronic Supplementary Information**

### **Heterotrivanthide Cluster Complexes Exhibiting Up-conversion Luminescence in Water**

Ryunosuke Karashimada, Koki Musha, Nobuhiko Iki

Graduate School of Environmental Studies, Tohoku University, 6-6-07 Aramaki-aoba, Aoba-ku, Sendai 980-8579 Japan.

#### **Table of Contents**

- 1 Experimental
- 2 Estimation of the Yb-centered luminescence intensity
- 3 Lists of Figures and Tables

## 1 Experimental

### 1-1 Materials

A stock solution of 0.01 M  $\text{Ln}(\text{NO}_3)_3$  ( $\text{Ln} = \text{Yb}, \text{Er}, \text{Tb}$ ) was prepared by dissolving  $\text{Ln}(\text{NO}_3)_3$  with 99.95% purity (Kanto Chemical Company, Inc.) in 0.01 M  $\text{HNO}_3$ . The concentrations of the metal ions in the stock solutions were determined using commonly accepted chelatometry. Thiocalix[4]arene-*p*-tetrasulfonate (TCAS) was synthesized as previously reported<sup>1</sup> and stocked in a 0.01 M aqueous solution. 2-[4-(2-Hydroxyethyl)-1-piperadiny]ethanesulfonic acid (HEPES, Dojindo Laboratories), N-cyclohexyl-3-aminopropanesulfonic acid (CAPS, Dojindo Laboratories), and  $\text{NH}_3$  solution (Kanto Chemical Company, Inc.) were used as a buffer solution by adjusting the pH with NaOH, and then diluting the solution in an appropriate water volume. Acetonitrile ( $\text{CH}_3\text{CN}$ , Kanto Chemical Company, Inc.) was used as an eluent by mixing it with pure water. Tetrabutylammonium bromide (TBABr, FUJIFILM Wako Pure Chemical Corporation, Ltd.) was used as an ion-pairing reagent.

### 1-2 Equipment

High-performance liquid chromatography (HPLC) was performed using a SHIMADZU LC-20AD pump and a SHIMADZU SPD-20A UV-Vis detector equipped with a Mightysil RP-18II column. Electro-spray ionization mass spectrometry (ESI-MS) was conducted using a SolariX 9.4T Fourier transform ion cyclotron resonance (FTICR) mass spectrometer (Bruker). The mass spectra were analyzed using the software iMass for Mac OS X ver. 1.1 (U. Roethlisberger, iMass for Mac OS X to be found <http://home.datacomm.ch/marvin/iMass/>). The excitation and emission spectra in the near-infrared region were obtained using a FluoroLog-<sup>®</sup>3 model FL3-11 spectrofluorometer (HORIBA Jobin Yvon Inc.) equipped with a 450 W Xe lamp as the excitation source and an InGaAs semiconductor detector (DSS-IGA020L). A spectrofluorometer F-7000 (Hitachi, Ltd.) combined with a 972 nm NIR laser (LE1166SPOLD, Hamamatsu Photonics) was used to record the UC luminescence in the visible region. The pH values of the sample solutions were measured using a TOA HM-25R pH meter equipped with a glass electrode. The luminescent decay curves were monitored using an LSP-1000 (UNISOKU Co., Ltd.) combined with a pulsed  $\text{N}_2$  laser (337.1 nm, 3.5 ns) as the excitation source and fitted using the nonlinear least-squares method.

### 1-3 Preparation and measurement of sample solution

Solutions of  $\text{Ln}(\text{NO}_3)_3$  ( $\text{Ln} = \text{Yb}$  or  $\text{Er}$ ), TCAS, and HEPES were mixed and stood 24 h at room temperature to prepare homotrinary complexes ( $[\text{Ln}] = 2.5 \mu\text{M}$ ,  $[\text{TCAS}] = 5.0 \mu\text{M}$ ,  $[\text{HEPES}] = 10 \text{ mM}$ , pH 7.4). Additionally, a mixture of two types of Ln salts (i.e.,  $\text{Er}-\text{Yb}$  or  $\text{Tb}-\text{Yb}$  pairs) was used to prepare heterotrinary  $\text{Ln}-\text{Ln}'-\text{TCAS}$  systems ( $[\text{Ln}] = [\text{Ln}'] = 2.5 \mu\text{M}$ ,  $[\text{TCAS}] = 5.0 \mu\text{M}$ ,  $[\text{HEPES}] = 10 \text{ mM}$ , pH 7.4). The  $\text{NH}_3$  solution was used instead of the HEPES solution and stood 60 °C to prepare a high concentration sample to observe UC luminescence

([Ln] = [Ln'] = 1.5 mM, [TCAS] = 2.0 mM, [NH<sub>3</sub>] = 0.1 M, pH 10). The sample solutions were diluted to the optimal conditions for HPLC measurements, ESI mass spectrometry, spectrophotometry, or lifetime analysis. In HPLC measurements, an eluent consisting of 45 wt% CH<sub>3</sub>CN in H<sub>2</sub>O with 10 mmol/kg HEPES (apparent pH 7.4) and 30 mmol/kg TBABr was used. The flow rate was set to 1.5 mL/min, and 20 μL of the sample solution was injected using a sample loop. In ESI-MS measurements, an appropriate amount of CH<sub>3</sub>CN was added to the sample solution, and the mass spectra were acquired in negative ion mode.

## 2 Estimation of the Yb-centered luminescence intensity

According to Fig. 2, we mainly discussed the ratio of the intensity of the NIR luminescence (Yb-centered luminescence) between Yb–TCAS and Er–Yb–TCAS system based on the concentration of Yb ion. On the other hand, the ratio of that based on the concentration of Ln<sub>3</sub>TCAS<sub>2</sub> complex (7.6 times) was additionally written in the manuscript without the detailed calculation. Here, we explain that the estimation of the ratio of the Yb-centered luminescence based on the concentration of Yb<sub>3</sub>TCAS<sub>2</sub> complex and Er<sub>2</sub>Yb<sub>1</sub>TCAS<sub>2</sub> complex or Er<sub>1</sub>Yb<sub>2</sub>TCAS<sub>2</sub> complex is as below.

Firstly, under the condition in Fig. 2, the concentration of the Yb<sub>3</sub>TCAS<sub>2</sub> for the Yb–TCAS system is approximately 0.833 μM ([Yb] = 2.5 μM, [TCAS] = 5.0 μM). In the Er–Yb–TCAS system, the total concentration of homo- and heterotrimeric complexes ( $[Er_{3-x}Yb_xTCAS_2] = [Er_3TCAS_2] + [Er_2Yb_1TCAS_2] + [Er_1Yb_2TCAS_2] + [Yb_3TCAS_2]$ ) for Er–Yb–TCAS system is approximately 1.67 μM ([Er] = [Yb] = 2.5 μM, [TCAS] = 5.0 μM). Since these systems contain an excess amount of TCAS, the Ln<sub>3</sub>TCAS<sub>2</sub> complex is formed quantitatively. In the Er–Yb–TCAS system, the ratio of  $[Er_3TCAS_2]:[Er_2Yb_1TCAS_2]:[Er_1Yb_2TCAS_2]:[Yb_3TCAS_2]$  is 1:3:3:1, based on the binomial distribution. The concentrations of each complex are:

$$[Er_3TCAS_2] = 1.67 \mu\text{M} \times 1/8 \approx 0.21 \mu\text{M}$$

$$[Er_2Yb_1TCAS_2] = 1.67 \mu\text{M} \times 3/8 \approx 0.625 \mu\text{M}$$

$$[Er_1Yb_2TCAS_2] = 1.67 \mu\text{M} \times 3/8 \approx 0.625 \mu\text{M}$$

$$[Yb_3TCAS_2] = 1.67 \mu\text{M} \times 1/8 \approx 0.21 \mu\text{M}$$

The contribution of the Yb-centered luminescence from Yb<sub>3</sub>TCAS<sub>2</sub> in the Er–Yb–TCAS system ( $I_{Yb_3TCAS_2 \text{ in Er-Yb-TCAS}}$ ) is:

$$I_{Yb_3TCAS_2 \text{ in Er-Yb-TCAS}} = I_{Yb-TCAS} \times 0.21/0.833 = 2.08 \times 0.21/0.833 = 0.52$$

The net Yb-centered luminescence of Er<sub>2</sub>Yb<sub>1</sub>TCAS<sub>2</sub> and Er<sub>1</sub>Yb<sub>2</sub>TCAS<sub>2</sub> complexes ( $I_{ErYbTCAS} = I_{Er_2Yb_1TCAS} + I_{Er_1Yb_2TCAS}$ ) is:

$$I_{ErYbTCAS} = I_{Er-Yb-TCAS} - I_{Yb_3TCAS_2 \text{ in Er-Yb-TCAS}} = 0.93 - 0.52 = 0.41$$

$$I_{Er_2Yb_1TCAS} = I_{Er_1Yb_2TCAS} = I_{ErYbTCAS} / 2 = 0.41 / 2 = 0.205$$

Finally, since the concentration of the complex for the  $I_{Yb-TCAS}$ ,  $I_{Er_2Yb_1TCAS}$ , and  $I_{Er_1Yb_2TCAS}$  were different,  $I_{Yb-TCAS}$ ,  $I_{Er_2Yb_1TCAS}$ , and  $I_{Er_1Yb_2TCAS}$  are normalized.

$$I_{Yb-TCAS} / [Yb_3TCAS_2] = 2.08 / 0.833 = 2.496 \text{ a.u./}\mu\text{M}$$

$$I_{Er_2Yb_1TCAS} / [Er_2Yb_1TCAS_2] = I_{Er_1Yb_2TCAS} / [Er_1Yb_2TCAS_2] = 0.205 / 0.625 = 0.328 \text{ a.u./}\mu\text{M}$$

Thus, the ratio of the intensity for the Yb-centered luminescence of the Yb–TCAS system compared with that of the Er–Yb–TCAS system is:

$$2.496 / 0.328 \approx 7.6$$

In conclusion, the intensity of the Yb-centered luminescence for the Yb–TCAS system (Yb<sub>3</sub>TCAS<sub>2</sub>) was approximately 7.6 times higher than that of the Er–Yb–TCAS system (Er<sub>2</sub>Yb<sub>1</sub>TCAS<sub>2</sub> or Er<sub>1</sub>Yb<sub>2</sub>TCAS<sub>2</sub>), which reflect the effect by the Yb→Er energy transfer.

### 3 Lists of Figures and Tables

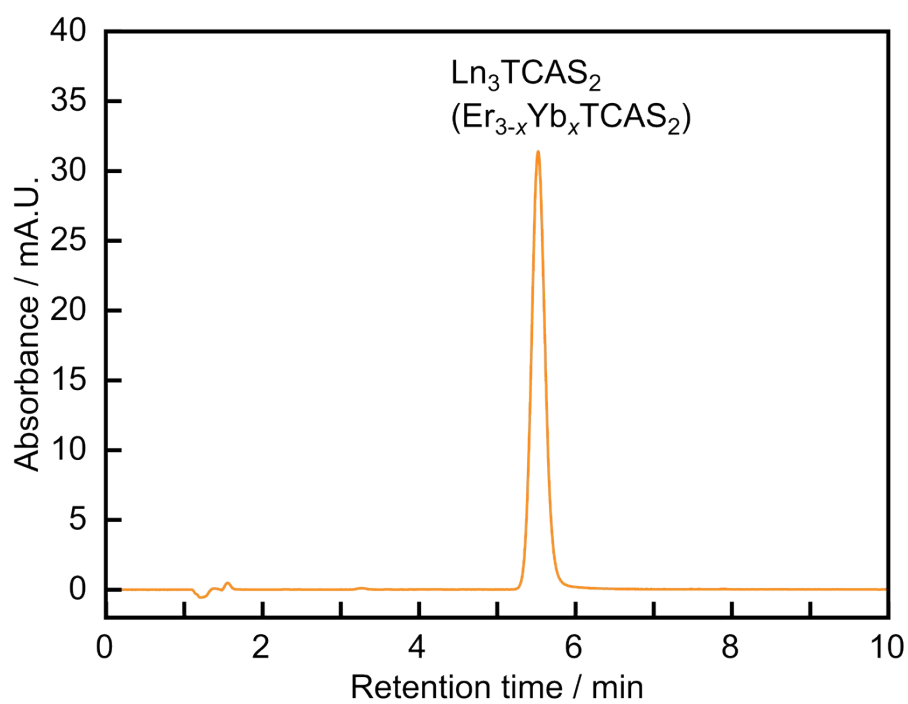

Fig. S1 Chromatogram of Er–Yb–TCAS system.  $[\text{Er}] = [\text{Yb}] = 1.5 \text{ mM}$ ,  $[\text{TCAS}] = 2.0 \text{ mM}$ ,  $[\text{NH}_3] = 0.1 \text{ M}$ ,  $\text{pH } 10$ ,  $\lambda = 316 \text{ nm}$ .

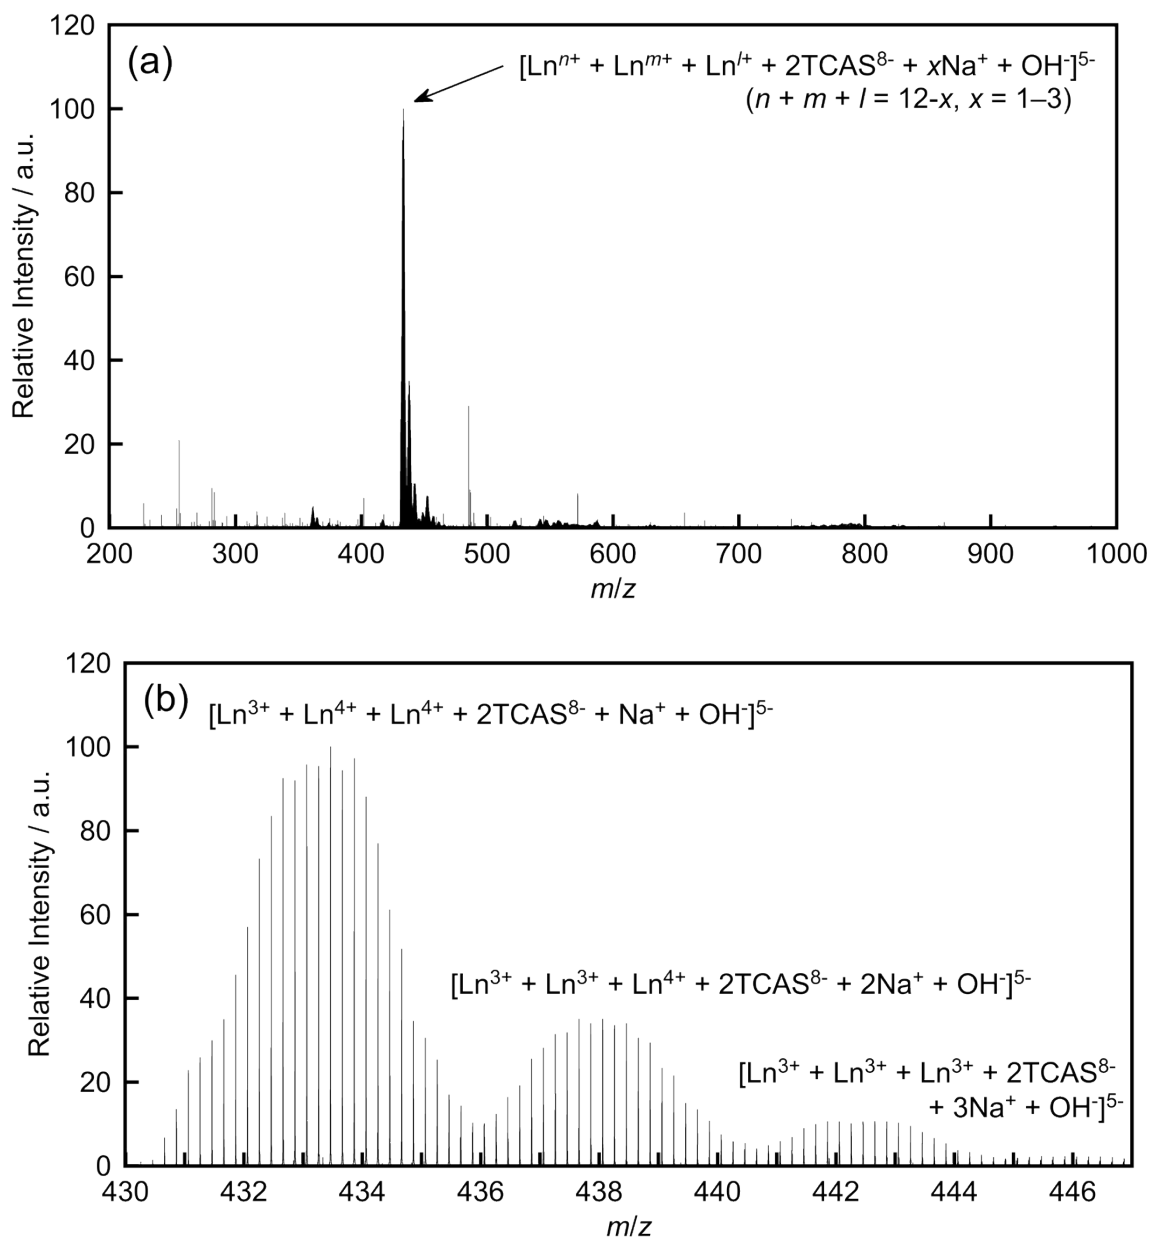

Fig. S2 ESI mass spectra of the Er–Yb–TCAS system.  $[\text{Er}] = [\text{Yb}] = 1.5 \text{ mM}$ ,  $[\text{TCAS}] = 2.0 \text{ mM}$ ,  $[\text{NH}_3] = 0,1 \text{ M}$ ,  $\text{pH } 10$ . (a) observed isotopic distribution  $m/z$  200–1000 and (b) expanded observed isotopic distribution  $m/z$  430–447.

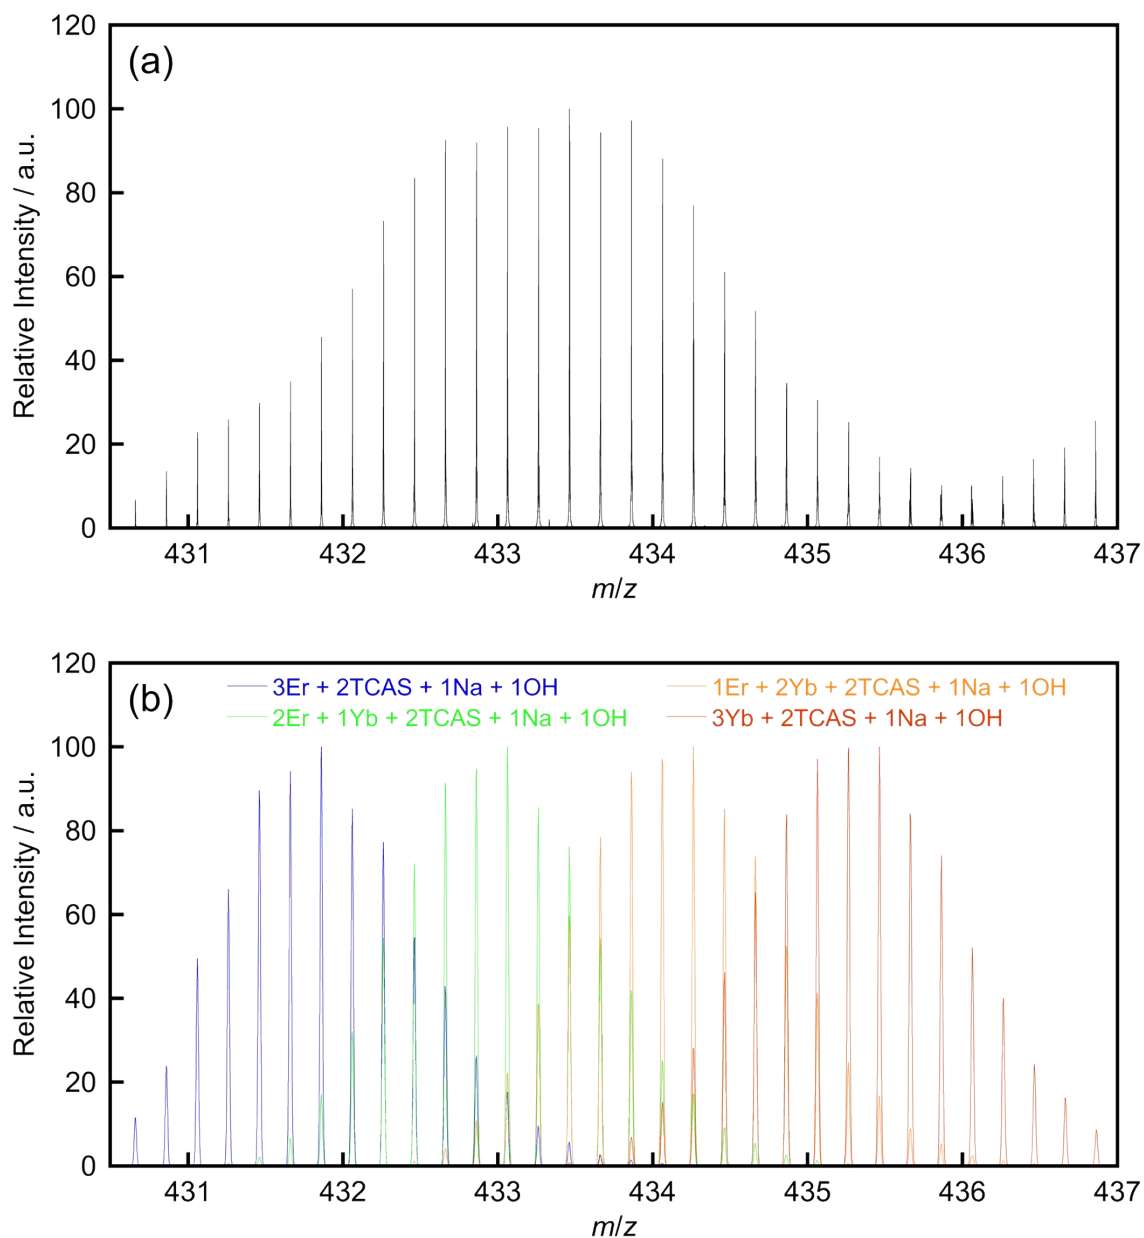

Fig. S3 ESI mass spectra of the Er–Yb–TCAS system. (a) Observed isotopic distribution around  $m/z$  430.5–437 and (b) Calculated isotopic distribution for  $\{[\text{Er}_{3-x}\text{Yb}_x\text{TCAS}_2]^{5-} + 1\text{Na}^+ + 1\text{OH}^-\}^{5-}$  ( $x = 0\text{--}3$ ).

Table S1 The assignment of the observed peaks around  $m/z$  430.5–437.

| Observed<br>$m/z$ | Calculation<br>$m/z$ | Assignment                                                                 | difference / ppm |
|-------------------|----------------------|----------------------------------------------------------------------------|------------------|
| 431.8618          | 431.8624             | $[\text{Er}_3\text{TCAS}_2]^{5-} + 1\text{Na}^+ + 1\text{OH}^-$            | -1.28            |
| 433.0633          | 433.0634             | $[\text{Er}_2\text{Yb}_1\text{TCAS}_2]^{5-} + 1\text{Na}^+ + 1\text{OH}^-$ | -0.25            |
| 434.2647          | 434.2633             | $[\text{Er}_1\text{Yb}_2\text{TCAS}_2]^{5-} + 1\text{Na}^+ + 1\text{OH}^-$ | 3.29             |
| 435.4661          | 435.4651             | $[\text{Yb}_3\text{TCAS}_2]^{5-} + 1\text{Na}^+ + 1\text{OH}^-$            | 2.30             |

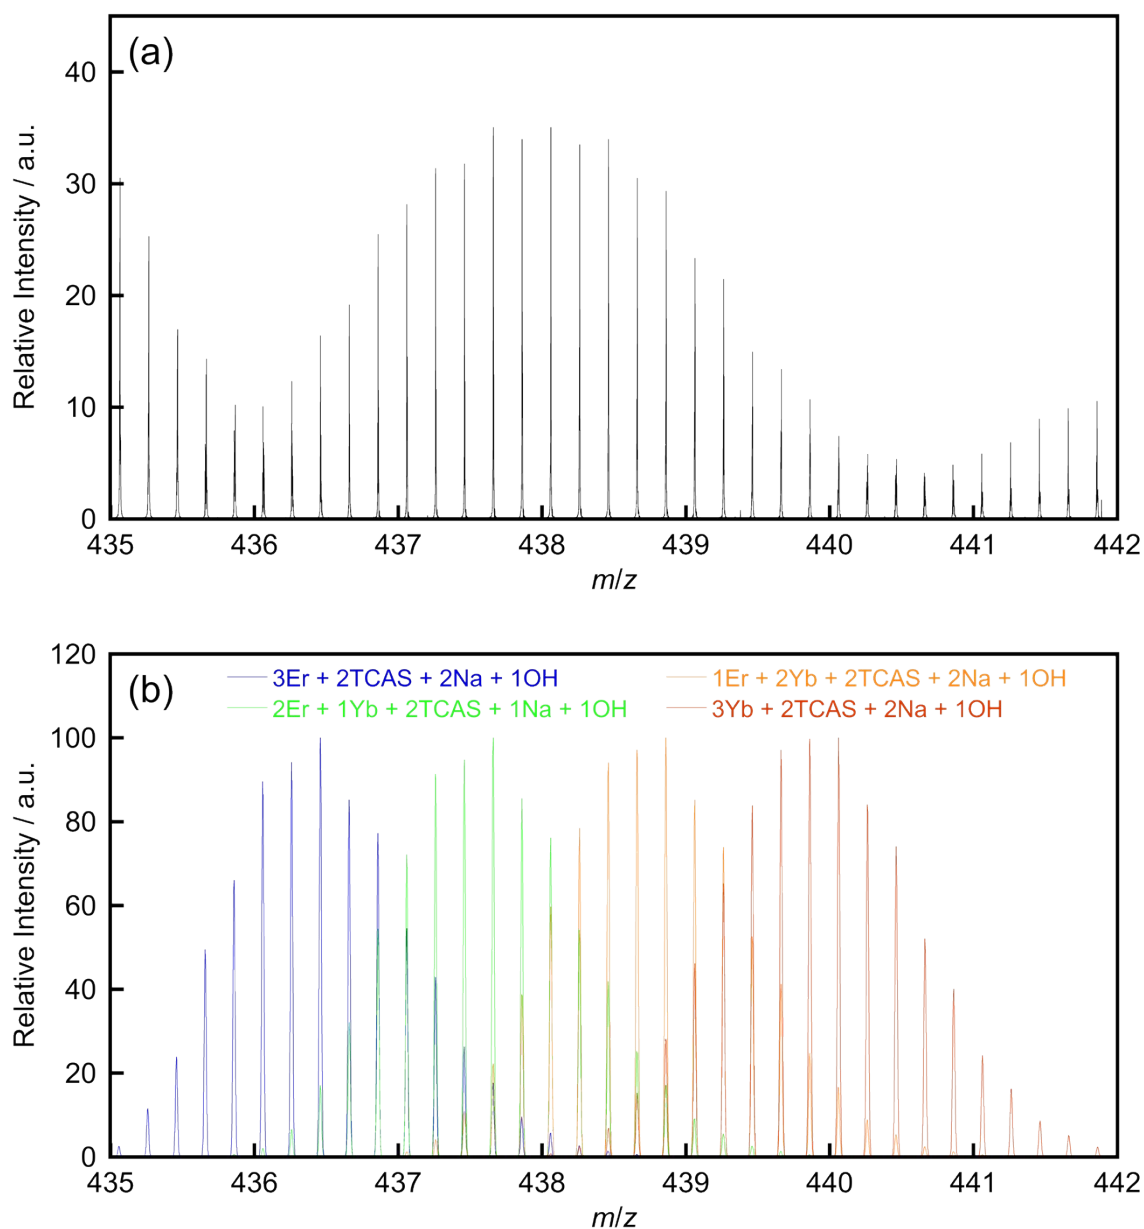

Fig. S4 ESI mass spectra of the Er–Yb–TCAS system. (a) Observed isotopic distribution around  $m/z$  435–442 and (b) Calculated isotopic distribution for  $\{[\text{Er}_{3-x}\text{Yb}_x\text{TCAS}_2]^{6-} + 2\text{Na}^+ + 1\text{OH}^-\}^{5-}$  ( $x = 0-3$ ).

Table S2 The assignment of the observed peaks around  $m/z$  435–442.

| Observed<br>$m/z$ | Calculation<br>$m/z$ | Assignment                                                                 | difference / ppm |
|-------------------|----------------------|----------------------------------------------------------------------------|------------------|
| 436.4599          | 436.4604             | $[\text{Er}_3\text{TCAS}_2]^{6-} + 2\text{Na}^+ + 1\text{OH}^-$            | -1.12            |
| 437.6633          | 437.6614             | $[\text{Er}_2\text{Yb}_1\text{TCAS}_2]^{6-} + 2\text{Na}^+ + 1\text{OH}^-$ | 4.23             |
| 438.8627          | 438.8612             | $[\text{Er}_1\text{Yb}_2\text{TCAS}_2]^{6-} + 2\text{Na}^+ + 1\text{OH}^-$ | 3.32             |
| 440.0640          | 440.0630             | $[\text{Yb}_3\text{TCAS}_2]^{6-} + 2\text{Na}^+ + 1\text{OH}^-$            | 2.18             |



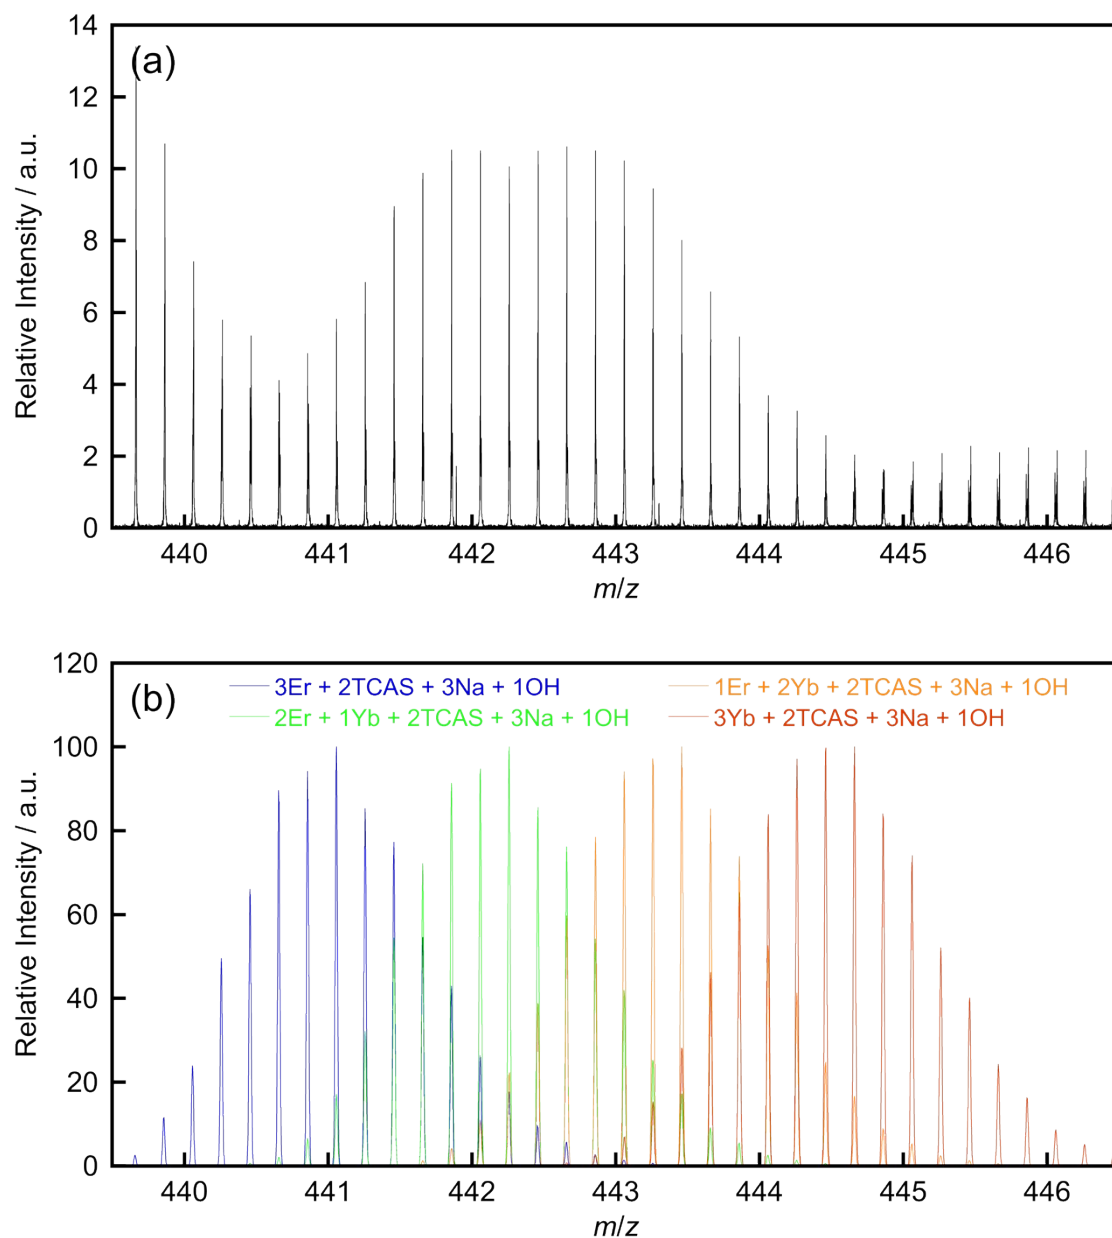

Fig. S5 ESI mass spectra of the Er–Yb–TCAS system. (a) Observed isotopic distribution around  $m/z$  439–447 and (b) Calculated isotopic distribution for  $\{[\text{Er}_{3-x}\text{Yb}_x\text{TCAS}_2]^{7-} + 3\text{Na}^+ + 1\text{OH}^-\}^{5-}$  ( $x = 0-3$ ).

Table S3 The assignment of the observed peaks around  $m/z$  439–447.

| Observed<br>$m/z$ | Calculation<br>$m/z$ | Assignment                                                                 | difference / ppm |
|-------------------|----------------------|----------------------------------------------------------------------------|------------------|
| 441.0581          | 441.0583             | $[\text{Er}_3\text{TCAS}_2]^{7-} + 3\text{Na}^+ + 1\text{OH}^-$            | -0.40            |
| 442.2598          | 442.2593             | $[\text{Er}_2\text{Yb}_1\text{TCAS}_2]^{7-} + 3\text{Na}^+ + 1\text{OH}^-$ | 1.09             |
| 443.4610          | 443.4592             | $[\text{Er}_1\text{Yb}_2\text{TCAS}_2]^{7-} + 3\text{Na}^+ + 1\text{OH}^-$ | 4.09             |
| 444.6627          | 444.6610             | $[\text{Yb}_3\text{TCAS}_2]^{7-} + 3\text{Na}^+ + 1\text{OH}^-$            | 3.84             |

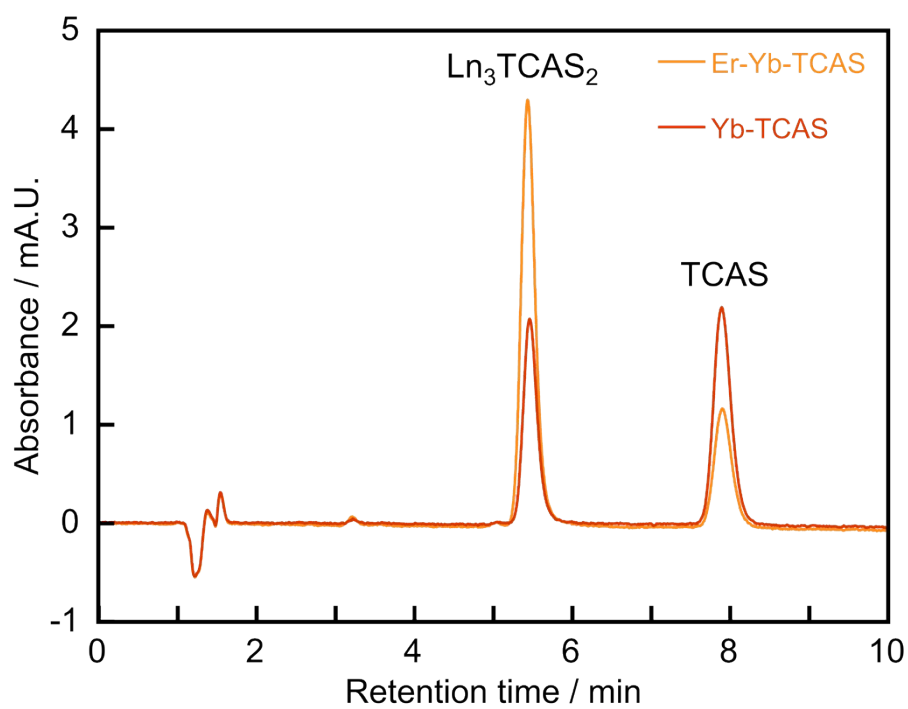

Fig. S6 Chromatograms of Er–Yb–TCAS and Yb–TCAS systems. Er–Yb–TCAS system: [Er] = [Yb] = 2.5  $\mu$ M, [TCAS] = 5.0  $\mu$ M, [HEPES] = 10 mM, pH 7.4,  $\lambda$  = 316 nm, Yb–TCAS system: [Yb] = 2.5  $\mu$ M, [TCAS] = 5.0  $\mu$ M, [HEPES] = 10 mM, pH 7.4,  $\lambda$  = 316 nm.

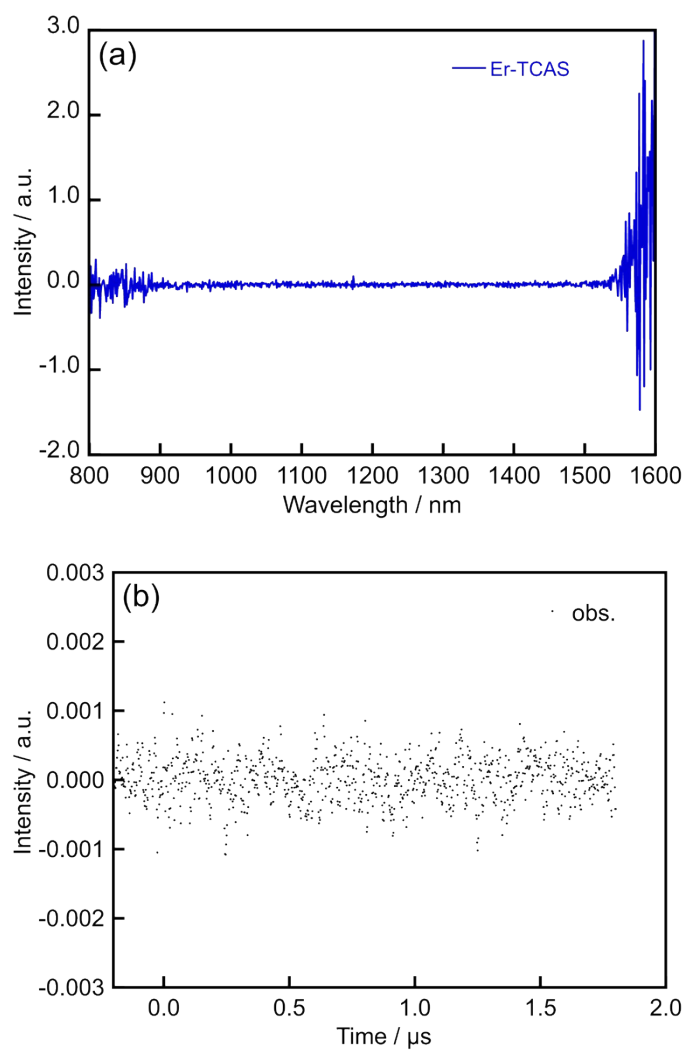

Fig. S7 (a) Emission spectra and (b) decay curve of the Er-TCAS system.  $[\text{Er}] = 30 \mu\text{M}$ ,  $[\text{TCAS}] = 20 \mu\text{M}$ ,  $[\text{HEPES}] = 10 \text{ mM}$ ,  $\text{pH } 7.4$ ,  $\lambda_{\text{ex}} = 313 \text{ nm}$  for (a), and  $337.1 \text{ nm}$  for (b).

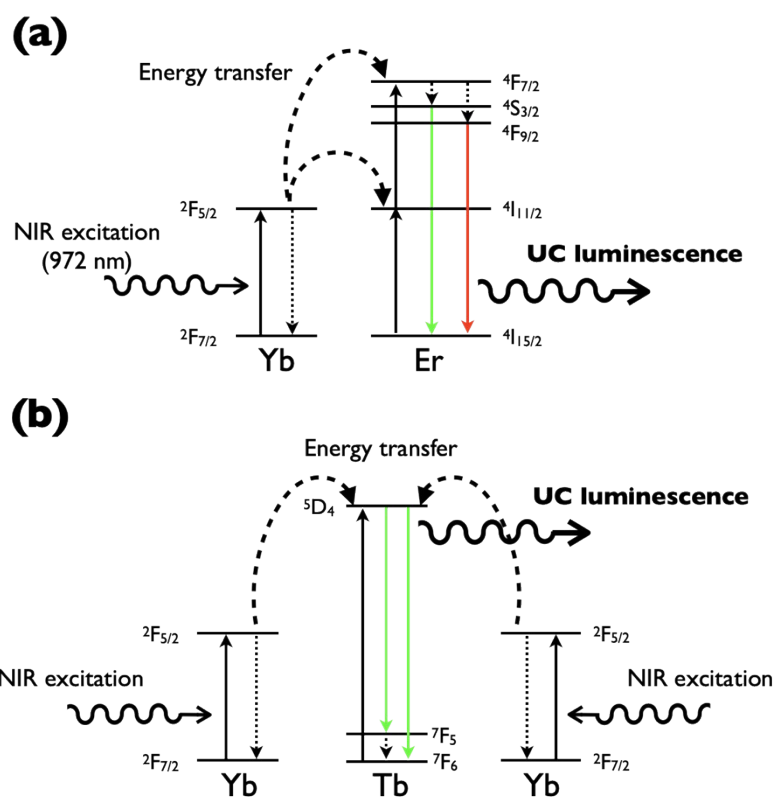

Fig. S8 Energy diagrams and proposed energy transfer paths for UC luminescence in (a) Er-Yb-TCAS and (b) Tb-Yb-TCAS systems.

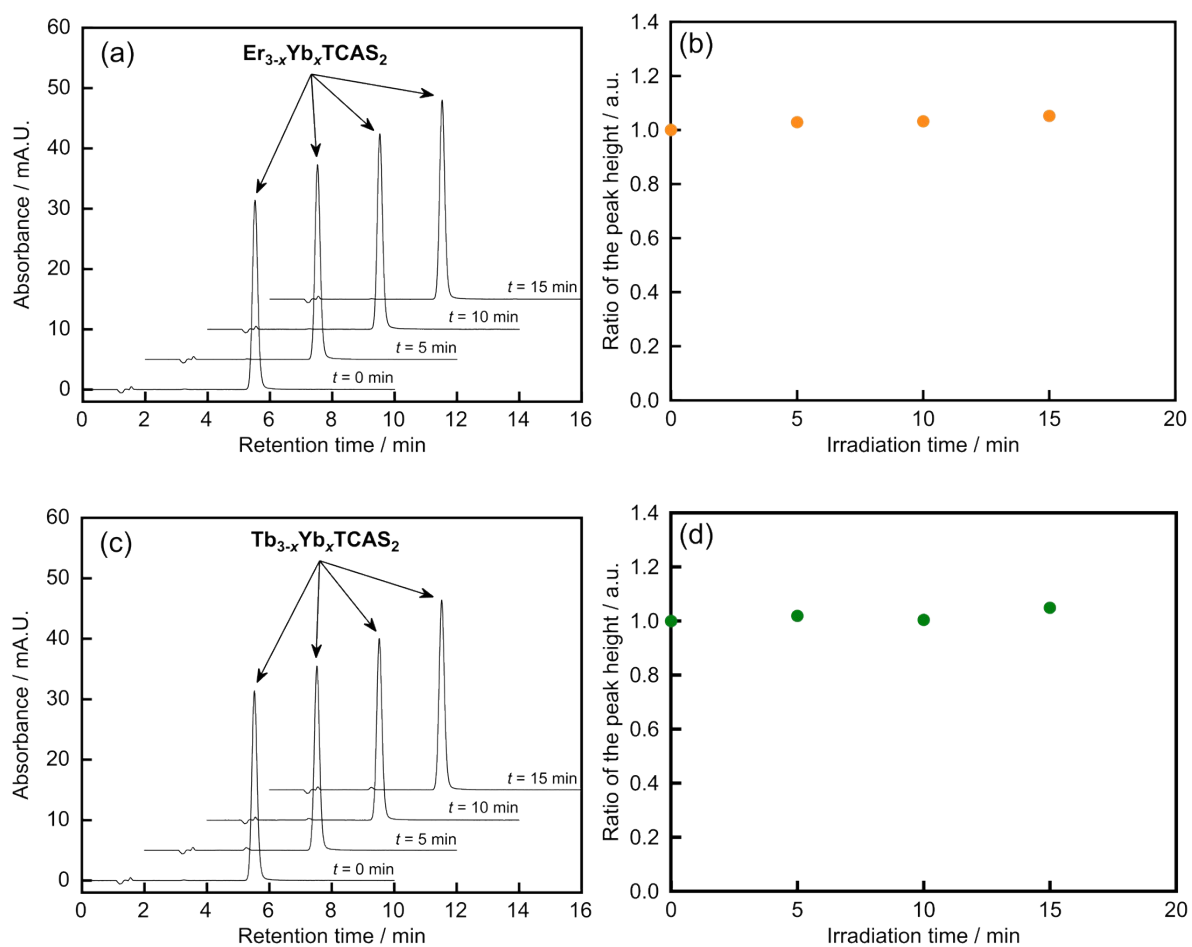

Fig. S9 The stability against NIR laser irradiation ( $\lambda = 972$  nm,  $P = 2.2$  W). Time-dependence of chromatograms (a) and of the normalized peak height for  $\text{Er}_{3-x}\text{Yb}_x\text{TCAS}_2$  ( $x = 0-3$ ) (b) in the Er–Yb–TCAS system.  $[\text{Er}] = [\text{Yb}] = 1.5$  mM,  $[\text{TCAS}] = 2.0$  mM,  $[\text{NH}_3] = 0.1$  M, pH 10,  $\lambda = 316$  nm, irradiation time  $t = 0-15$  min. Time-dependence of chromatograms (c) and of the normalized peak height for  $\text{Tb}_{3-x}\text{Yb}_x\text{TCAS}_2$  ( $x = 0-3$ ) (d) in the Tb–Yb–TCAS system.  $[\text{Tb}] = [\text{Yb}] = 1.5$  mM,  $[\text{TCAS}] = 2.0$  mM,  $[\text{NH}_3] = 0.1$  M, pH 10,  $\lambda = 316$  nm, irradiation time  $t = 0-15$  min.
